# Supplementary material for: Activation of canonical Wnt signalling is required for TGF-β-mediated fibrosis
Source: PubMed Central journal article supplement — Nat Commun. 2012 Mar 13;3:735–. doi: 10.1038/ncomms1734 (PMC3316881; doi:10.1038/ncomms1734), 2012-03-13
Supplement: ncomms1734-s1.pdf [file ncomms1734-s1.pdf]

## Supplementary Information

### Supplementary Figures

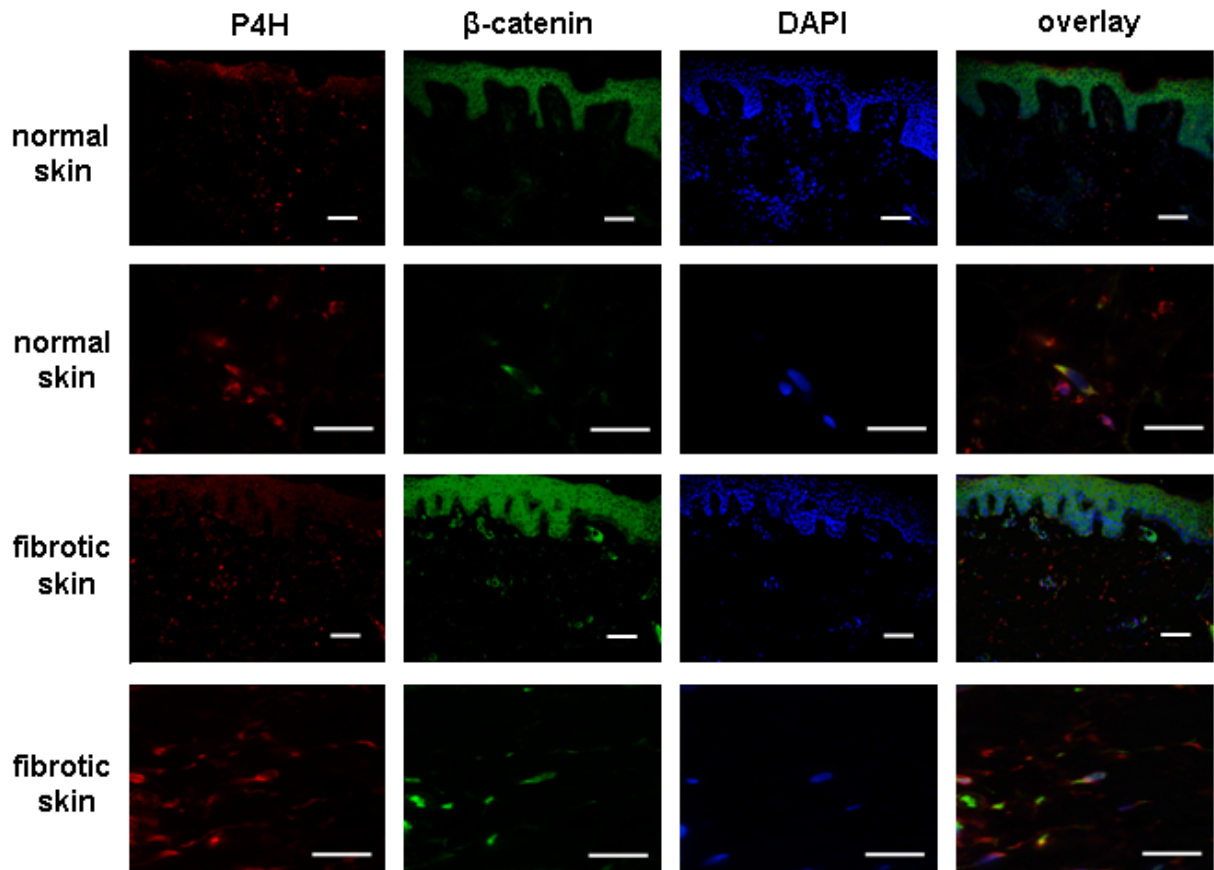

**Supplementary Figure S1:  $\beta$ -catenin accumulates in the nuclei of fibroblasts in fibrotic skin.** Representative images of fibrotic skin triple stained for  $\beta$ -catenin, prolyl-4-hydroxylase- $\beta$  and DAPI are shown at low magnification and at high magnification as used for counting (scale bar 100  $\mu$ m in all images). P4H: prolyl-4-hydroxylase- $\beta$ .

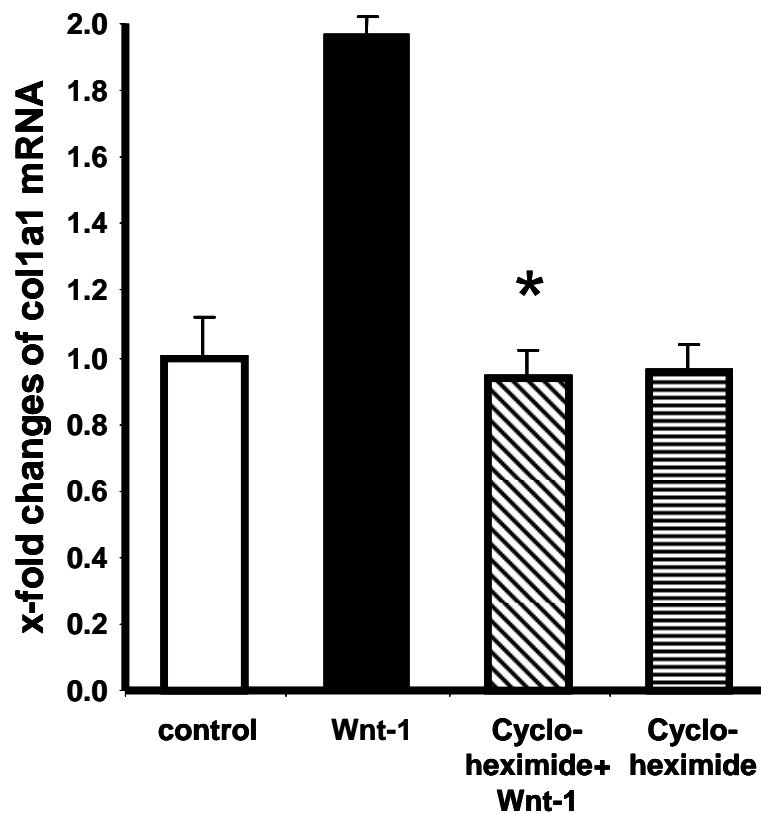

**Supplementary Figure S2: The stimulatory effects of Wnts on the release of collagen require protein neosynthesis.** Cycloheximide, an inhibitor of translation, completely blocked the induction of col 1a1 mRNA by recombinant Wnt-1, demonstrating that the stimulatory effects of Wnt-1 on collagen synthesis are indirect and require the synthesis of other proteins as second mediators. n = 5 for each group. \* indicates p-values of less than 0.05 as analyzed using the Wilcoxon signed rank test compared to fibroblasts stimulated with Wnt-1 in the absence of cycloheximide.

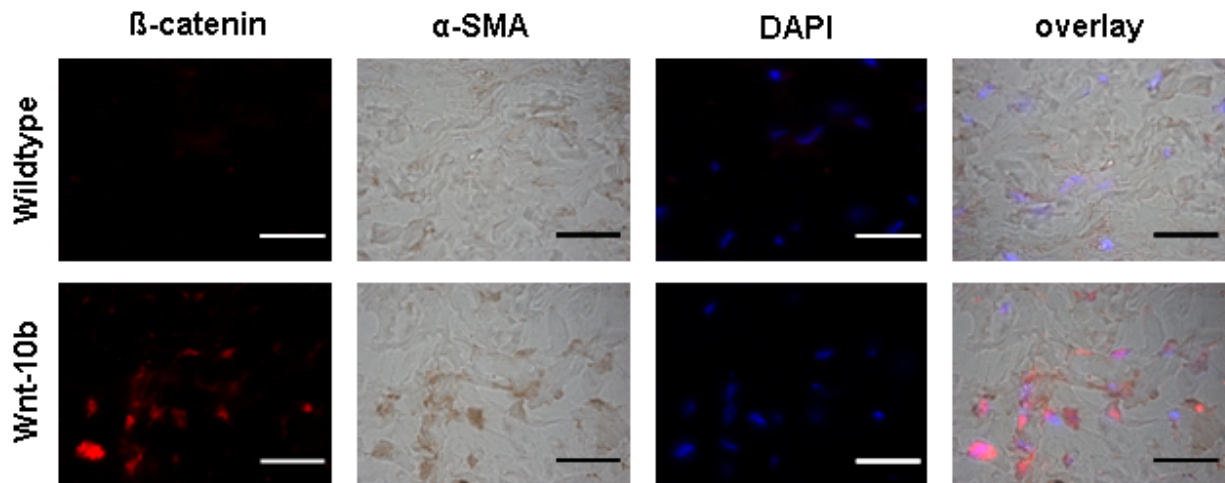

**Supplementary Figure S3: Canonical Wnt signaling is activated in myofibroblasts in the skin of Wnt-10b transgenic mice.** Triple staining for DAPI,  $\beta$ -catenin and  $\alpha$ SMA demonstrated a prominent nuclear accumulation of  $\beta$ -catenin in skin sections from Wnt-10b tg mice, but not control mice. Representative images are shown at high magnification (scale bar 100  $\mu$ m).

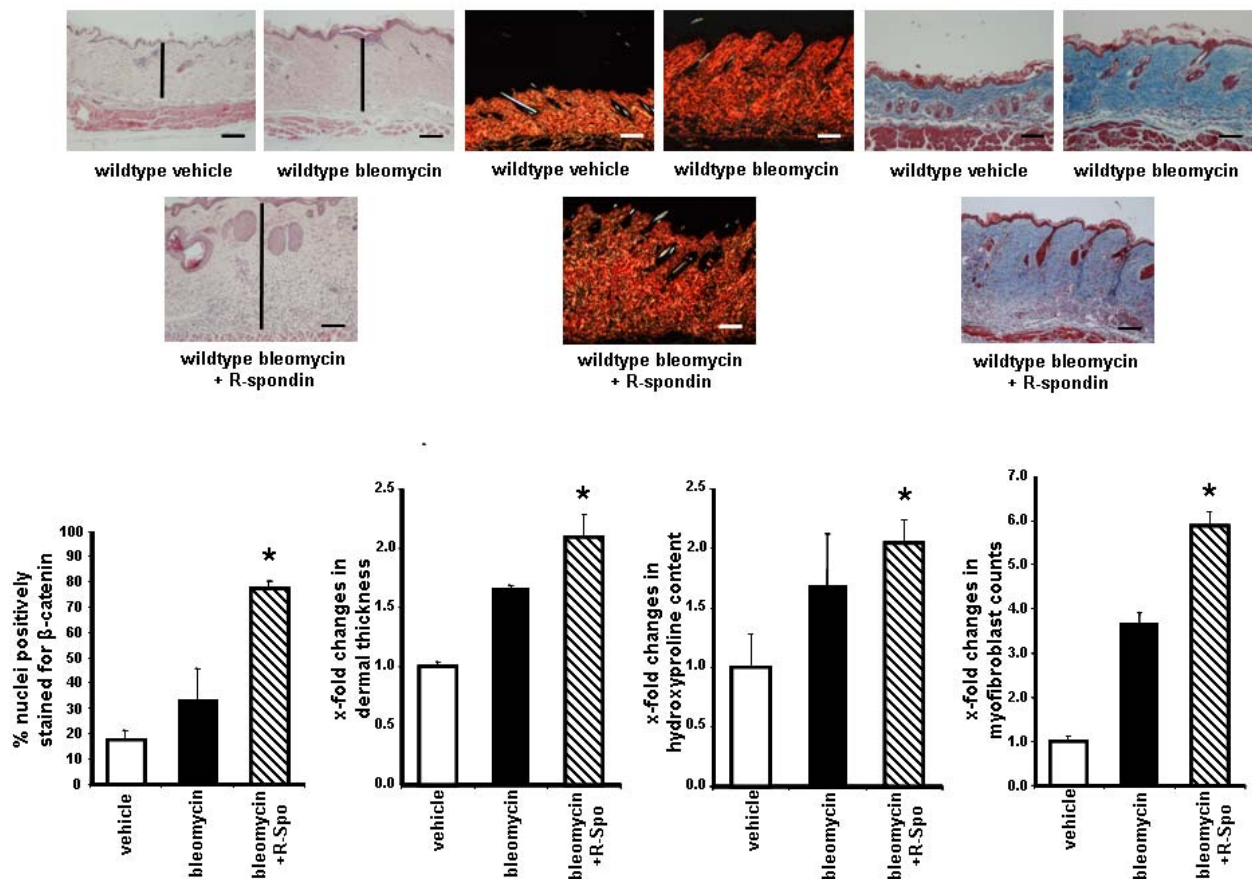

### Supplementary Figure S4: R-spondin-1 exacerbates bleomycin-induced dermal fibrosis.

Treatment with R-spondin-1 resulted in a more pronounced activation of the canonical Wnt pathway with increased nuclear accumulation of  $\beta$ -catenin in fibroblasts. R-spondin-1 enhanced bleomycin induced dermal fibrosis with more pronounced dermal thickening, increased hydroxyproline content and higher myofibroblast counts as compared to mice injected only with bleomycin. Representative sections stained with HE-, Sirius Red- and Trichrome stained sections are shown (scale bar 100  $\mu$ m).  $n \geq 5$  for all groups. \* indicates p-values of less than 0.05 (as analyzed with the Mann-Whitney U-test) compared to bleomycin treated mice without R-spondin-1.  $n = 6$  for each group.

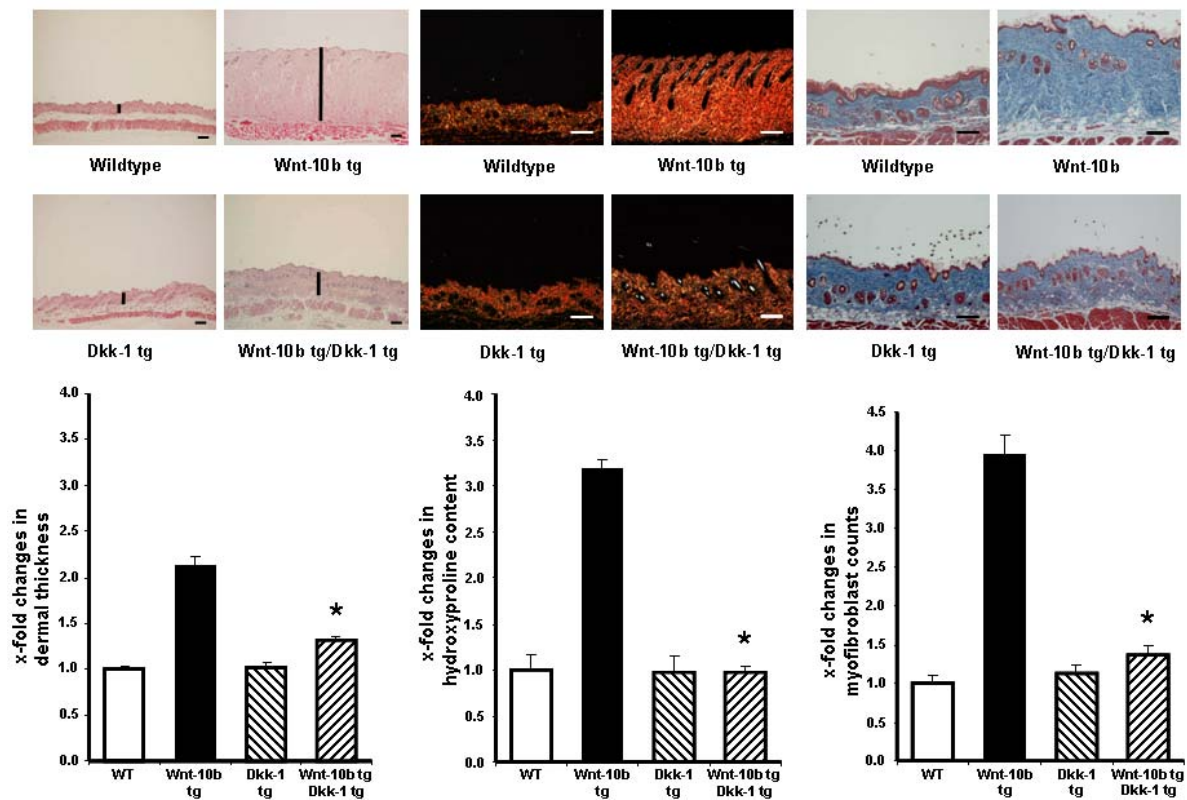

**Supplementary Figure S5: Transgenic overexpression of Dkk-1 prohibited fibrosis in Wnt-10b transgenic mice.** Representative sections stained with HE-, Sirius Red- and Trichrome stained sections are shown (scale bar 100). Transgenic overexpression of Dkk-1 prevented Wnt-10b induced dermal thickening, accumulation of hydroxyproline and differentiation of resting fibroblasts into myofibroblasts ( $n \geq 6$  for all groups). Wnt-10b tg = Wnt-10b transgenic mice. \* indicates p-values of less than 0.05 (as analyzed with the Mann-Whitney U-test) compared to Wnt-10b tg mice not overexpressing Dkk-1.

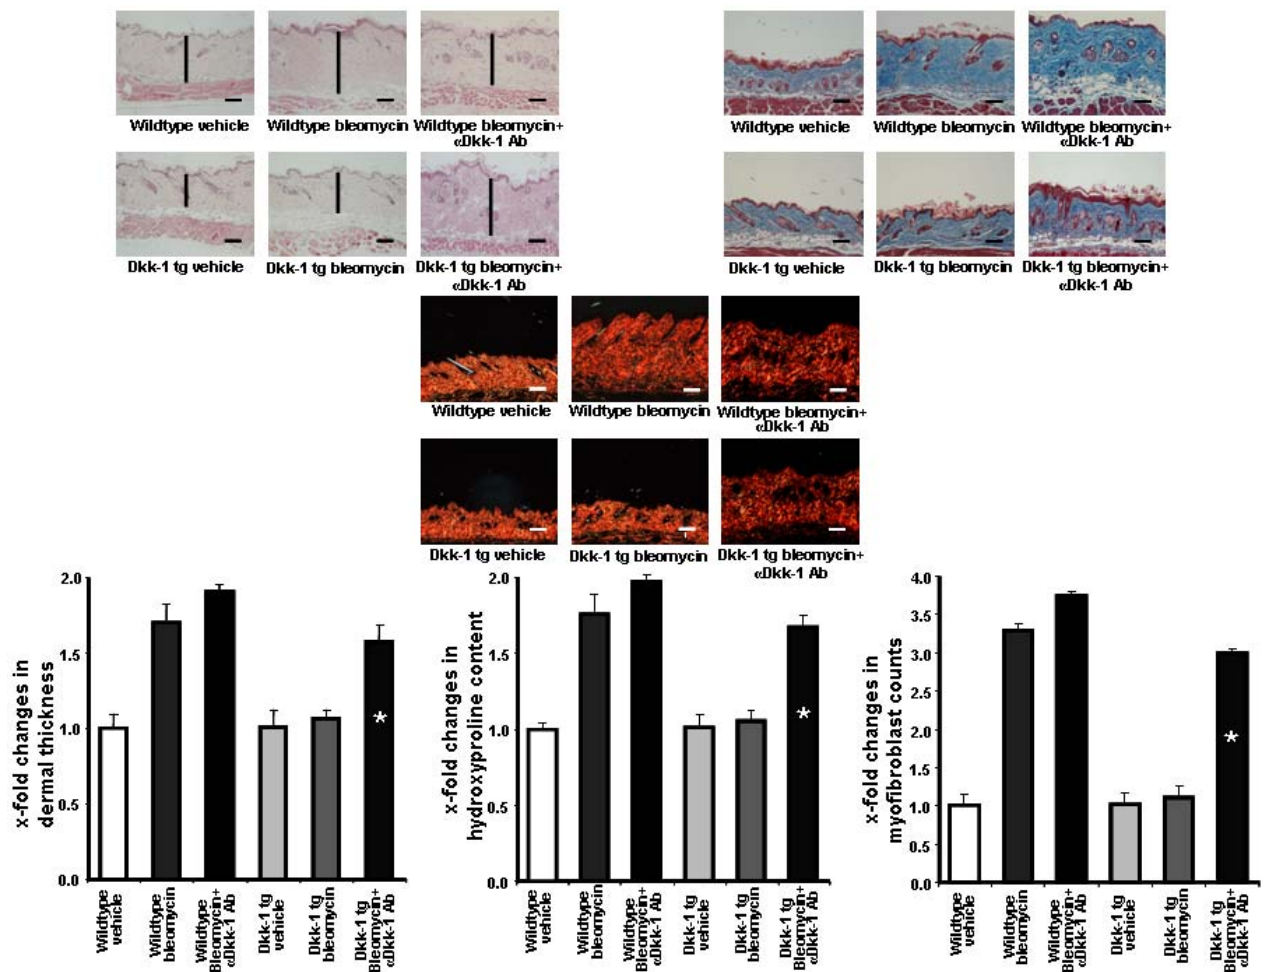

**Supplementary Figure S6: Neutralization of Dkk-1 has no major effect on fibrosis in wildtype mice.** Consistent with the finding that the levels of Dkk-1 are strongly decreased and almost undetectable in fibrotic diseases, treatment of wildtype mice with neutralizing antibodies against Dkk-1 resulted only in slightly increased bleomycin-induced dermal fibrosis. In contrast, treatment of Dkk-1 transgenic mice with neutralizing antibodies against Dkk-1 resulted in a significant exacerbation of fibrosis with increased dermal thickness, hydroxyproline content and myofibroblast counts (scale bar 100  $\mu$ m). \* indicates p-values of less than 0.05 (as analyzed with the Mann-Whitney U-test) compared to sham treated, bleomycin challenged Dkk-1 tg mice.  $\alpha$ Dkk-1: neutralizing antibodies against Dkk-1.  $n \geq 5$  for each group.

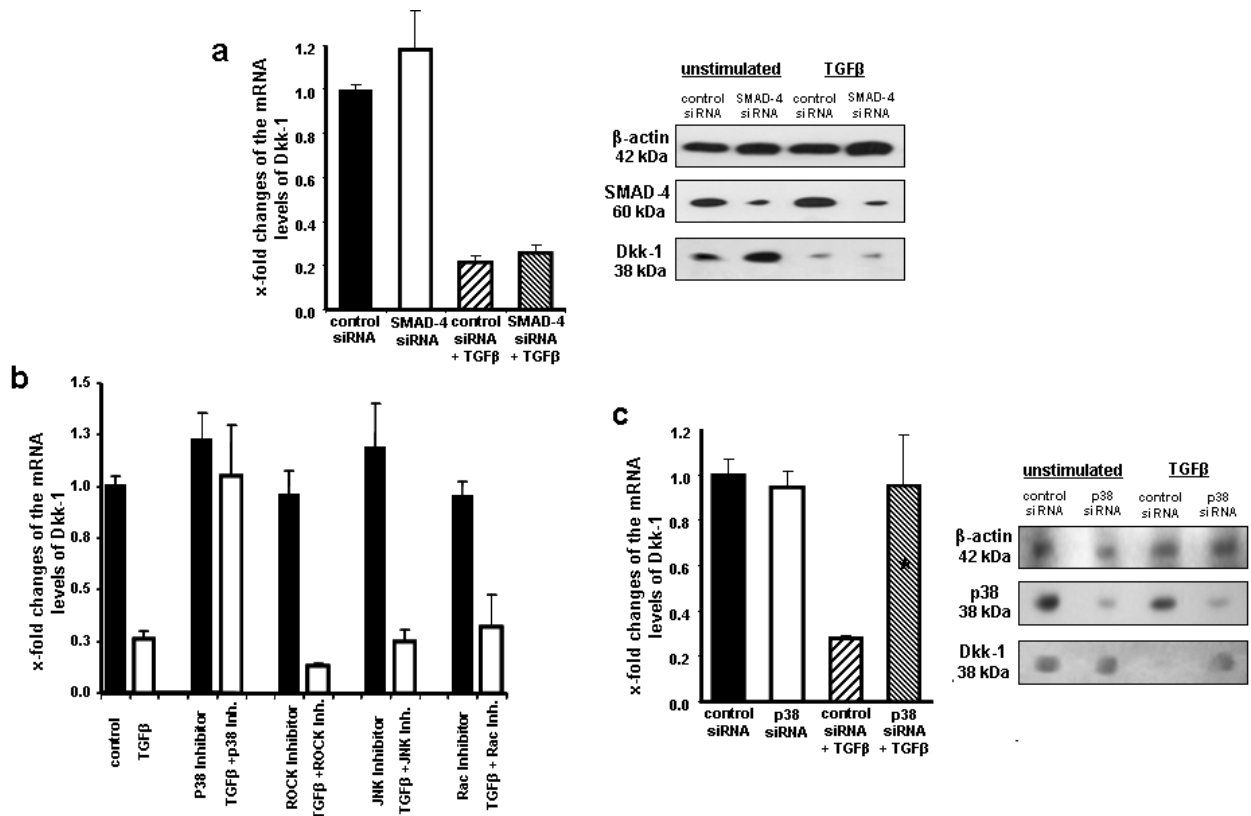

**Supplementary Figure S7: TGF- $\beta$  - induced downregulation of Dkk-1 requires p38. (a)** siRNAs against Smad4 did not prevent the decrease of Dkk-1 mRNA and protein upon incubation with TGF- $\beta$  (n = 4). **(b)** Inhibition of ROCK, JNK and Rac also did not reduce the inhibitory effects of TGF- $\beta$  (n = 4). However, pharmacological inhibition of p38 prevented the TGF- $\beta$  induced downregulation of Dkk-1. **(c)** siRNA mediated knockdown of p38 completely prevented the TGF- $\beta$  induced downregulation of Dkk-1 mRNA and protein (n = 6). \* indicates p-values of less than 0.05 as compared to TGF- $\beta$  stimulated fibroblasts as analyzed using the Wilcoxon signed rank test.

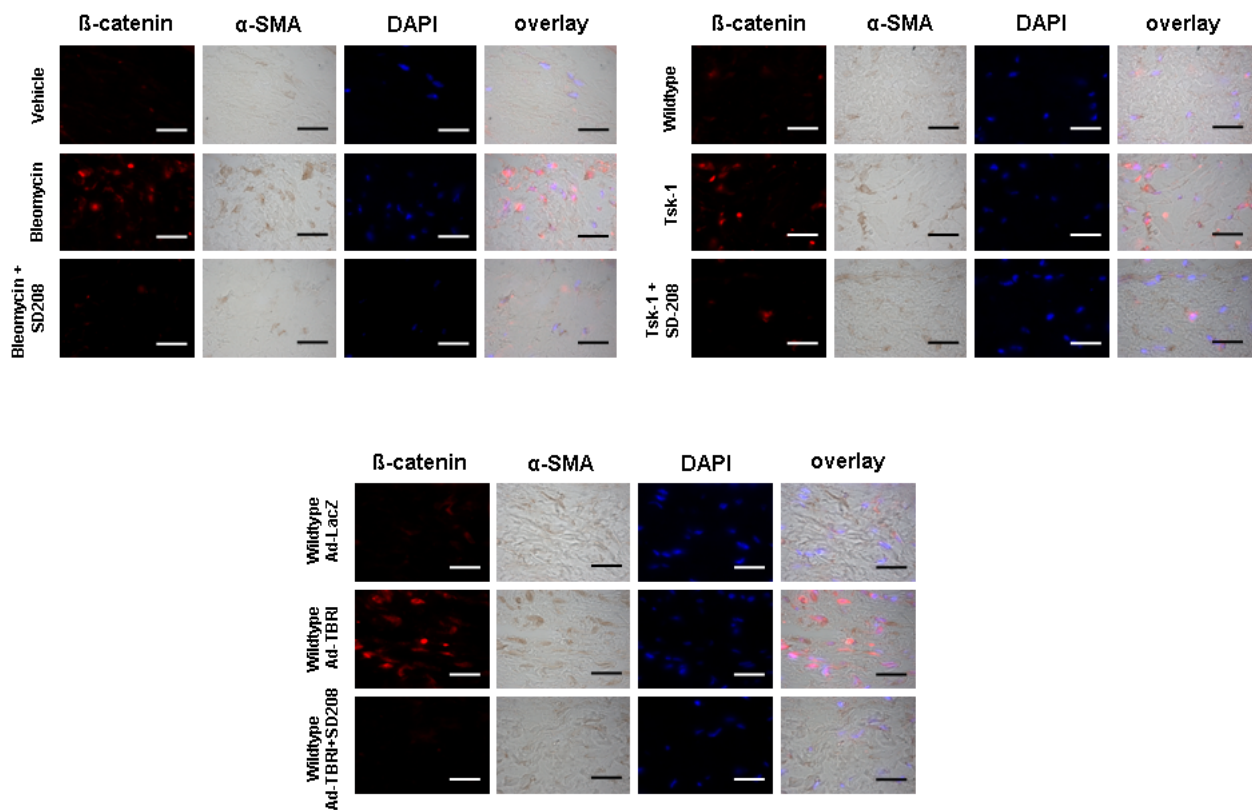

**Supplementary Figure S8: Inhibition of TGF- $\beta$  signaling reduces the nuclear accumulation of  $\beta$ -catenin in myofibroblasts.** Triple staining for DAPI,  $\beta$ -catenin and  $\alpha$ SMA demonstrated that treatment with SD-208, a selective inhibitor of TBRI, prevented the nuclear accumulation of  $\beta$ -catenin in myofibroblasts in bleomycin-induced fibrosis, in Tsk-1 mice and in Ad-TBRI<sup>act</sup> induced fibrosis (scale bar 100  $\mu$ m).
